# Supplementary material for: Tobacco mosaic virus templated synthesis of one dimensional inorganic–polymer hybrid fibres
Source: Royal Society of Chemistry journal article supplement (doi:10.1039/b901130g), 2009-01-01
Supplement: b901130g.pdf [file b901130g.pdf]

## Tobacco mosaic virus templated synthesis of one dimensional inorganic/polymer hybrid fibres

Jianhua Rong,<sup>ab</sup> Fiona Oberbeck,<sup>b</sup> Xinnan Wang,<sup>c</sup> Xiaodong Li,<sup>d</sup> Jerry Oxsher,<sup>b</sup> Zhongwei Niu,<sup>b\*</sup> and Qian Wang<sup>b\*</sup>

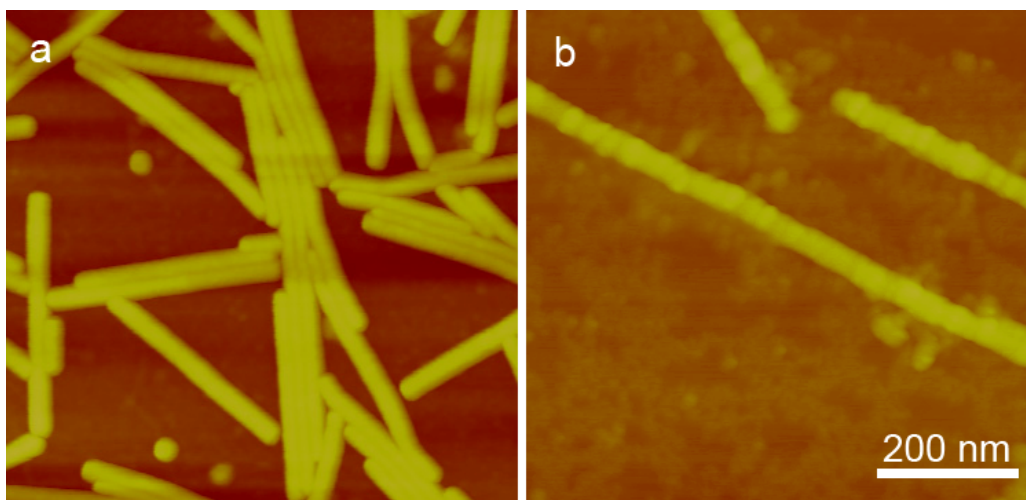

**Figure S1.** AFM height images of (a) TMV and (b) TiO<sub>2</sub>/PTLF.
